# Supplementary material for: Competing Transfer Pathways in Direct and Indirect DynamicNuclear Polarization MAS NMR Experiments on HIV-1 CapsidAssemblies: Implications for Sensitivity and Resolution
Source: Copernicus journal article supplement (doi:10.5194/mr-2021-13), 2021-02-04
Supplement: Supplementary file 1 [file mr-2021-13-supplement.pdf]

*Supporting Information For*

**Competing Transfer Pathways in Direct and Indirect Dynamic Nuclear Polarization  
MAS NMR Experiments on HIV-1 Capsid Assemblies: Implications for Sensitivity  
and Resolution**

Ivan V. Sergeyev<sup>1</sup>, Caitlin M. Quinn<sup>2</sup>, Jochem Struppe<sup>1</sup>, Angela Gronenborn<sup>3,4\*</sup>, Tatyana Polenova<sup>2,3\*</sup>

*<sup>1</sup>Bruker Biospin Corporation, 15 Fortune Drive, Billerica, Massachusetts 01821, United States; <sup>2</sup>Department of Chemistry and Biochemistry, University of Delaware, Newark, Delaware 19716, United States; <sup>3</sup>Pittsburgh Center for HIV Protein Interactions, University of Pittsburgh School of Medicine, 1051 Biomedical Science Tower 3, 3501 Fifth Avenue, Pittsburgh, Pennsylvania 15261, United States; <sup>4</sup>Department of Structural Biology, University of Pittsburgh School of Medicine, 3501 Fifth Ave., Pittsburgh, PA 15261, United States;*

**\*Corresponding authors:** Tatyana Polenova, Department of Chemistry and Biochemistry, University of Delaware, Newark, DE, USA, Tel.: (302) 831-1968; Email: [tpolenov@udel.edu](mailto:tpolenov@udel.edu); Angela M. Gronenborn, Department of Structural Biology, University of Pittsburgh School of Medicine, 3501 Fifth Ave., Pittsburgh, PA 15260, USA, Tel.: (412) 648-9959; Email: [amg100@pitt.edu](mailto:amg100@pitt.edu)

**Keywords:** magic angle spinning NMR, dynamic nuclear polarization, DNP, HIV-1 capsid

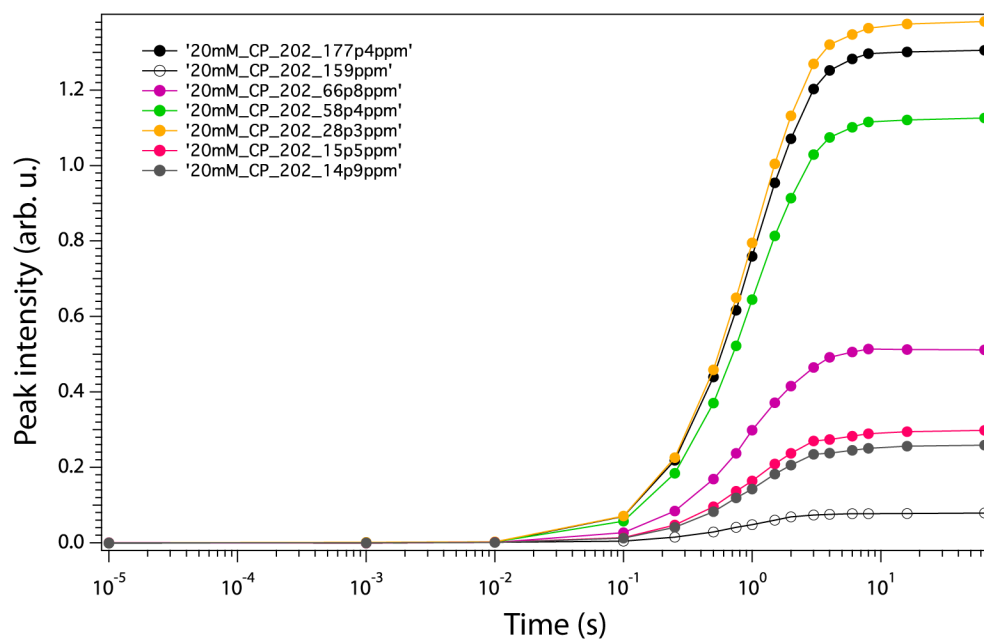

**Figure S1.** Buildup profiles for  $^{13}\text{C}$  signals in DNP-enhanced CPMAS spectra of tubular assemblies of 5F-Trp,U- $^{13}\text{C}$ ,  $^{15}\text{N}$  CA containing 22.8 mM AMUPol. Signals corresponding to different functional groups are color coded and the corresponding chemical shifts are displayed on the bottom right. The spectra were acquired at 14.1 T (150.96 MHz  $^{13}\text{C}$  Larmor frequency) at MAS frequency of 24 kHz and temperature of 120 K.
